# Supplementary material for: A Nutraceutical Rich in Docosahexaenoic Acid Improves Portal Hypertension in a Preclinical Model of Advanced Chronic Liver Disease
Source: PubMed Central journal article supplement (PMC6835927; doi:10.3390/nu11102358), 2019-10-03
Supplement: nutrients-11-02358-s001.pdf [file nutrients-11-02358-s001.pdf]

# Supplementary materials: A nutraceutical rich in docosahexaenoic acid improves portal hypertension in a preclinical model of advanced chronic liver disease

Zoe Boyer-Diaz, Joan Carles Domingo, Estefanía de Gregorio, Nicolò Manicardi, Peio Aristu-Zabalza, Begoña Cordobilla, Laia Abad-Jorda, Martí Ortega-Ribera, Anabel Fernández-Iglesias, Montserrat Mari, Jaime Bosch and Jordi Gracia-Sancho

Supplementary Table S1. List of primer sequences for quantitative PCR studies.

| <i>Rattus norvegicus</i> genes | Forward (5'→3')       | Reverse (3'→5')          | Product size (bp) |
|--------------------------------|-----------------------|--------------------------|-------------------|
| IL-1 $\beta$                   | GCTTCCTTGTGCAAGTGTCT  | TCTGGACAGCCCAAGTCAAG     | 160               |
| IL-6                           | TCCGGAGAGGAGACTTCACA  | GCCATTGCACAACCTCTTTTCT   | 128               |
| IL-10                          | CCTGGTAGAAGTGATGCCCC  | AGACACCTTTGTCTTGGAGCTTAT | 194               |
| $\alpha$ -SMA                  | CTCATGCCATCATGCGTCTG  | CACGCTCAGCAGTAGTCACG     | 105               |
| collagen-1 $\alpha$ 1          | GTACATCAGCCCAAACCCCA  | TCGCTTCCATACTCGAACTGG    | 87                |
| gapdh                          | GGCATCGTGGAAGGGCTCAT  | AGGGATGATGTTCTGGGCTGC    | 120               |
| <i>Mus musculus</i> genes      | Forward (5'→3')       | Reverse (3'→5')          | Product size (bp) |
| IL-6                           | CCGGAGAGGAGACTTCACAG  | CAGAATTGCCATTGCACAAC     | 136               |
| tnf $\alpha$                   | CTGAACTTCGGGGTGATCGGT | ACGTGGGCTACAGGCTTGCA     | 134               |
| Arg1                           | TCGGAACTCAACGGGAGGGT  | TGCTTTGCTGTGATGCCCC<br>A | 108               |
| $\beta$ -actin                 | GACGGCCAGGTCATCACTAT  | CGGATGTCAACGTCACACTT     | 140               |

**Supplementary Table S2.** List of antibodies used for western blot studies.

| <b>Primary antibodies</b>       | <b>Supplier</b>    | <b>Species</b> | <b>Type</b> | <b>Dilution</b> | <b>Reference</b> |
|---------------------------------|--------------------|----------------|-------------|-----------------|------------------|
| $\alpha$ -SMA                   | Sigma              | Mouse          | Monoclonal  | 1:1000          | A2547            |
| Collagen-1 $\alpha$ 1           | Cell Signaling     | Rabbit         | Polyclonal  | 1:1000          | 84336S           |
| IL-1 $\beta$                    | Abcam              | Rabbit         | Polyclonal  | 1:1000          | ab9722           |
| IL-6                            | Abcam              | Mouse          | Monoclonal  | 1:1000          | ab9324           |
| TGF $\beta$                     | Santa Cruz         | Rabbit         | Polyclonal  | 1:1000          | SC-398           |
| PDGFR $\beta$                   | Santa Cruz         | Goat           | Polyclonal  | 1:1000          | SC-1627          |
| p65-NF $\kappa$ B               | Santa Cruz         | Rabbit         | Polyclonal  | 1:200           | SC-372           |
| GAPDH                           | Santa Cruz         | Mouse          | Monoclonal  | 1:1000          | SC-32233         |
| Lamin A/C                       | Santa Cruz         | Goat           | Polyclonal  | 1:200           | SC-6215          |
| <b>Secondary antibodies</b>     | <b>Supplier</b>    | <b>Species</b> | <b>Type</b> | <b>Dilution</b> | <b>Reference</b> |
| Anti-Mouse IgG (HRP conjugate)  | Sigma              | Rabbit         | Polyclonal  | 1:10000         | A9044            |
| Anti-Rabbit IgG (HRP conjugate) | Enzo Life Sciences | Goat           | Polyclonal  | 1:10000         | ADI-SAB-300-J    |
| Anti-Goat IgG (HRP conjugate)   | Santa Cruz         | Mouse          | Monoclonal  | 1:10000         | SC-2354          |

**Supplementary Table S3.** Effects of DHA administration on body and organ weight in a rat model of ACLD.

| Parameter         | Vehicle      | DHA          | p value |
|-------------------|--------------|--------------|---------|
| Body weight (g)   | 475 ± 11     | 506 ± 16     | 0.13    |
| Liver weight (g)  | 15.19 ± 0.97 | 15.26 ± 0.90 | > 0.20  |
| Spleen weight (g) | 1.39 ± 0.08  | 1.32 ± 0.09  | > 0.20  |

Results are expressed as mean ± S.E.M. n=11 and n=14, respectively, for vehicle and DHA.
